# Supplementary material
Source: MDPI journal article supplement (https://www.mdpi.com/2071-1050/12/22/9579)
Supplement: s1 [file s1]

# Development of a life cycle assessment allocation approach for circular economy in the built environment

## Supplementary material

### Content

|                                                                                                                                                       |   |
|-------------------------------------------------------------------------------------------------------------------------------------------------------|---|
| S1. Flow diagrams.....                                                                                                                                | 2 |
| S2. Mathematical expressions for the allocation of the reusable and recyclable material fractions of the exemplary circular building components. .... | 3 |
| S3. Deriving the CE LD approach .....                                                                                                                 | 6 |
| S4. Expert session evaluation of the developed CE LD approach.....                                                                                    | 9 |

## S1. Flow diagrams

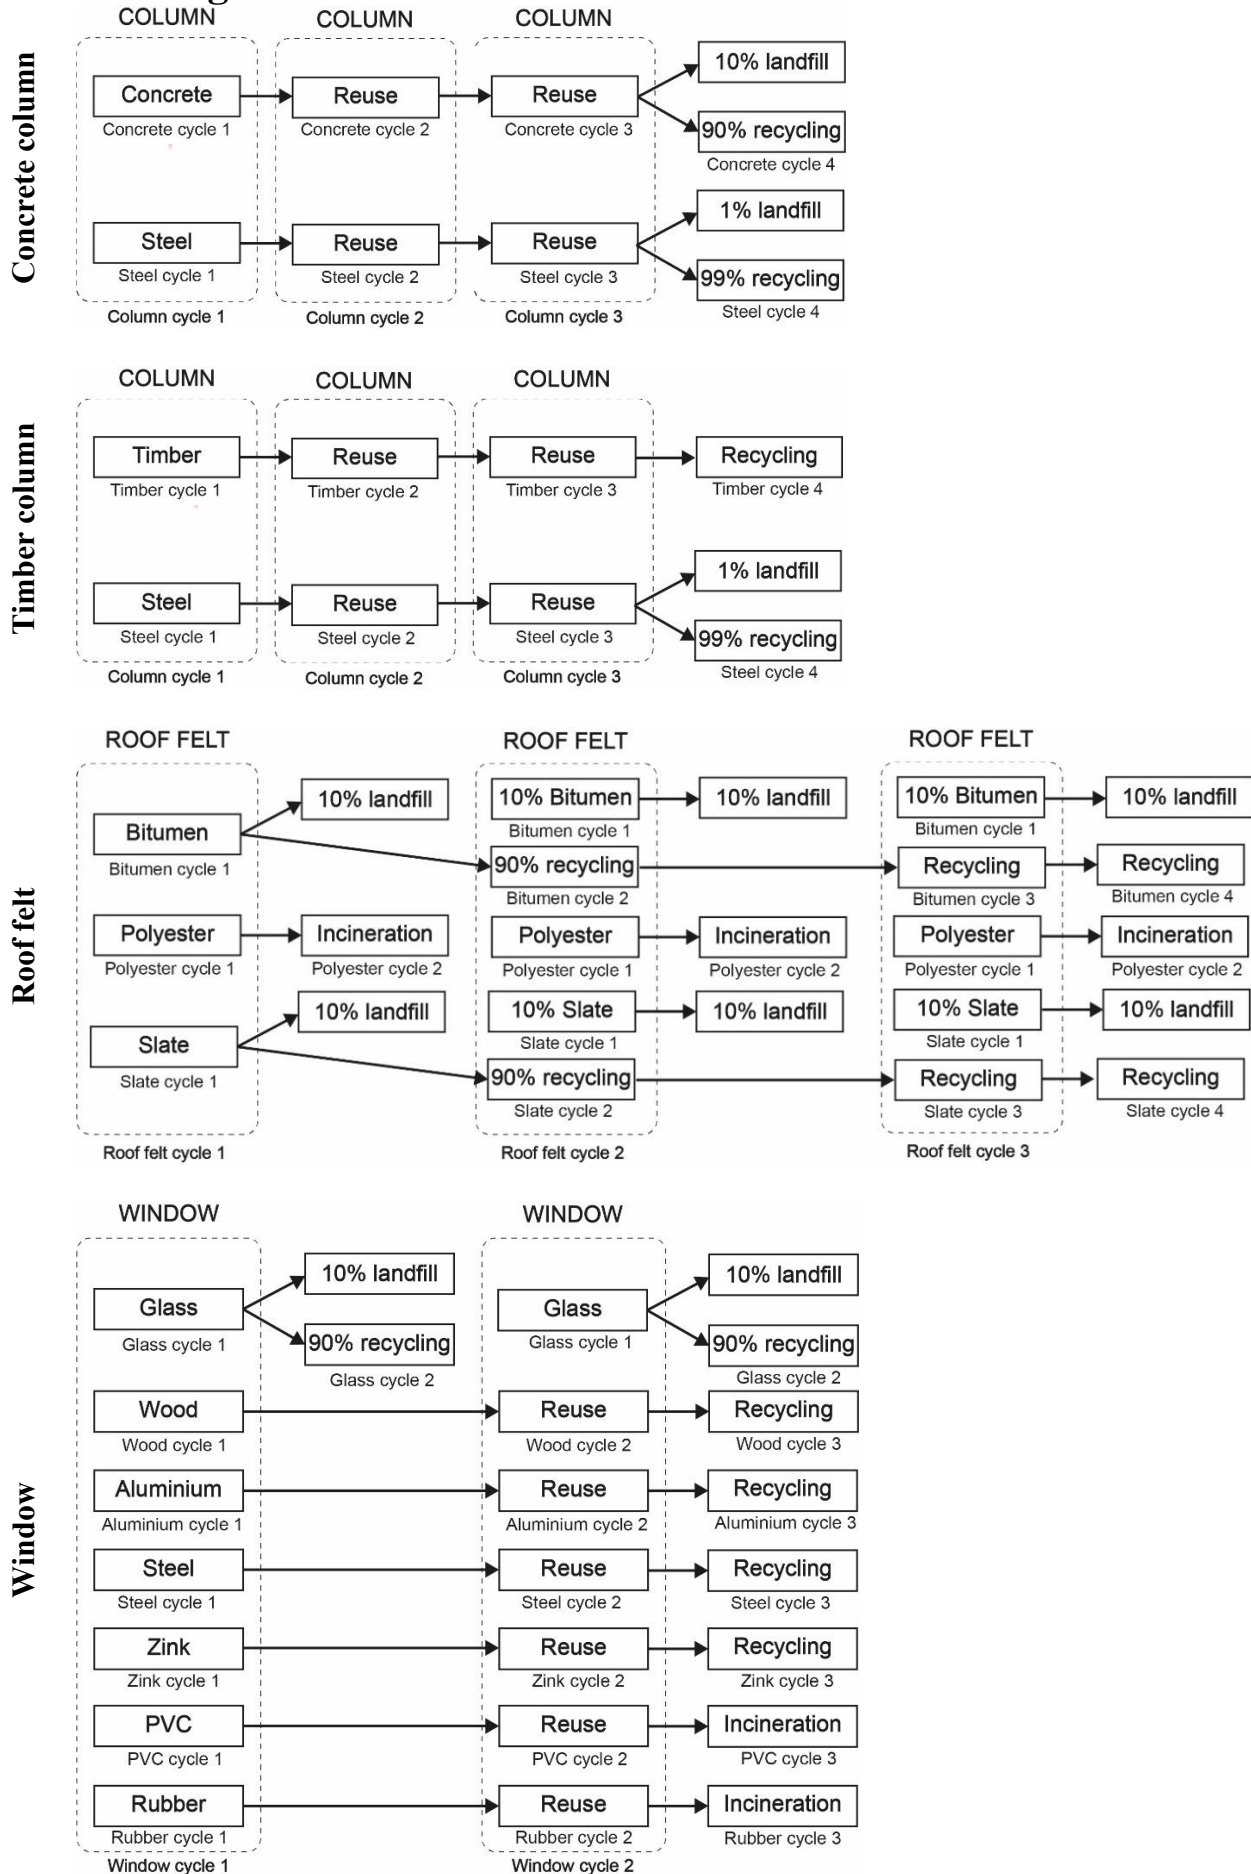

Note: punctured boxes indicate cycles of the primary function i.e. column, roof felt or window

## S2. Mathematical expressions for the allocation of the reusable and recyclable material fractions of the exemplary circular building components.

*Note:* Mathematical expressions have been harmonised for comparison reasons. The CFF has been shortened according to each of the circular building components. The LD approach and the impact distribution between the cycles is based on an example from Allacker et al. (2017)

| Common abbreviations used in equations | Unit pr. Unit value        | Definition                                                                                   |
|----------------------------------------|----------------------------|----------------------------------------------------------------------------------------------|
| V                                      | kg CO <sub>2</sub> eq. /kg | Emissions from virgin material production                                                    |
| R                                      | kg CO <sub>2</sub> eq. /kg | Emissions from reuse/recycling of material                                                   |
| D                                      | kg CO <sub>2</sub> eq. /kg | Emissions from disposal of waste material                                                    |
| A                                      |                            | Allocation factor                                                                            |
| R*                                     | kg CO <sub>2</sub> eq. /kg | Emissions assumed to be substituted by reused or recycled material                           |
| r <sub>1</sub>                         | unitless                   | Share of recycled content                                                                    |
| r <sub>2</sub>                         | unitless                   | Share of material that will be recycled at EoL                                               |
| r <sub>3</sub>                         | unitless                   | Share of material that will be used for energy recovery at EoL                               |
| Q <sub>p</sub>                         | unitless                   | The quality of the primary material respectively                                             |
| Q <sub>i</sub>                         | unitless                   | The quality of the ingoing secondary material                                                |
| Q <sub>o</sub>                         | unitless                   | The quality of the outgoing secondary material                                               |
| L                                      | MJ/kg                      | Lower heating value of the material in the component that is used for energy recovery at EoL |
| X <sub>ER,elec</sub>                   | unitless                   | The efficiency of the electricity energy recovery process                                    |
| X <sub>ER,heat</sub>                   | unitless                   | The efficiency of the heat energy recovery process                                           |

|               |                        |                                                                         |
|---------------|------------------------|-------------------------------------------------------------------------|
| $E_{SE,elec}$ | kg CO <sub>2</sub> eq. | The impact assumed to be substituted by the electricity energy recovery |
| $E_{SE,heat}$ | kg CO <sub>2</sub> eq. | The impact assumed to be substituted by the heat energy recovery        |

| Allocation approach            | 420x420x3500mm Peikko prefabricated concrete column (reuse)                                                                                                                                                                 | 350x350x3500mm cross laminated timber column (reuse)                                                                                                                                                                     | 1 m <sup>2</sup> Icopal Top 500 P roof felt (recycling)                                                                                                                                                                                                                                                                        | 1230x1480mm Velfac energy 200 window (reuse)                                                                                                                                                                                                                                                                             |
|--------------------------------|-----------------------------------------------------------------------------------------------------------------------------------------------------------------------------------------------------------------------------|--------------------------------------------------------------------------------------------------------------------------------------------------------------------------------------------------------------------------|--------------------------------------------------------------------------------------------------------------------------------------------------------------------------------------------------------------------------------------------------------------------------------------------------------------------------------|--------------------------------------------------------------------------------------------------------------------------------------------------------------------------------------------------------------------------------------------------------------------------------------------------------------------------|
|                                | 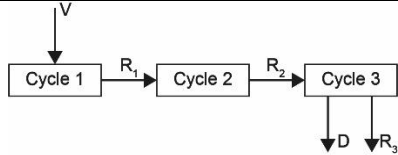                                                                                                                                           |                                                                                                                                        |                                                                                                                                                                                                                                             |                                                                                                                                                                                                                                       |
| <b>EN 15804/1597 8 cut-off</b> | <b>Cycle 1</b> = $V+R_1$<br><b>Cycle 2</b> = $R_2$<br><b>Cycle 3</b> = $R_3+D$                                                                                                                                              | <b>Cycle 1</b> = $V+R_1$<br><b>Cycle 2</b> = $R_2$<br><b>Cycle 3</b> = $R_3+D$                                                                                                                                           | <b>Cycle 1</b> = $V_1+R_1+D_1$<br><b>Cycle 2</b> = $V_2+R_2+D_2$<br><b>Cycle 3</b> = $V_3+R_3+D_3$                                                                                                                                                                                                                             | <b>Cycle 1</b> = $V_1+R_1+R_2+D_1$<br><b>Cycle 2</b> = $V_2+R_3+D_2$                                                                                                                                                                                                                                                     |
| <b>50:50</b>                   | <b>Cycle 1</b> = $V+0.5 \cdot R_1$<br><b>Cycle 2</b> = $0.5 \cdot R_1+0.5 \cdot R_2$<br><b>Cycle 3</b> = $0.5 \cdot R_2+0.5 \cdot R_3+D$<br><br>Where $0.5 \cdot R_3$ is allocated to the subsequent cycle                  | <b>Cycle 1</b> = $V+0.5 \cdot R_1$<br><b>Cycle 2</b> = $0.5 \cdot R_1+0.5 \cdot R_2$<br><b>Cycle 3</b> = $0.5 \cdot R_2+0.5 \cdot R_3+D$<br><br>Where $0.5 \cdot R_3$ is allocated to the subsequent cycle               | <b>Cycle 1</b> = $V_1+0.5 \cdot R_1+D_1$<br><b>Cycle 2</b> = $V_2+0.5 \cdot R_1+0.5 \cdot R_2+D_1$<br><b>Cycle 3</b> = $V_3+0.5 \cdot R_2+0.5 \cdot R_3+D_3$<br><br>Where $0.5 \cdot R_3$ is allocated to the subsequent cycle                                                                                                 | <b>Cycle 1</b> = $V_1+0.5 \cdot R_1+D_1$<br><b>Cycle 2</b> = $V_2+0.5 \cdot R_1+0.5 \cdot R_2+D_1$<br><br>Where $0.5 \cdot R_2$ is allocated to the subsequent cycle                                                                                                                                                     |
| <b>CFE</b>                     | <b>Cycle 1,2,3</b> = $V+(1-A) \cdot r_2 \cdot ((R_1+R_2+R_3)-R_3^* \cdot (Q_o/Q_p))+(1-r_2) \cdot D)/3$<br><br>Where $r_2$ is 90% concrete and 99% steel recycling at EoL, $R_3^*$ is 90% concrete and 99% steel recycling. | <b>Cycle 1,2,3</b> = $V+(1-A) \cdot r_2 \cdot ((R_1+R_2+R_3)-R_3^* \cdot (Q_o/Q_p))+(1-r_2) \cdot D)/3$<br><br>Where $r_2$ is 100% wood and 99% steel recycling at EoL, $R_3^*$ is 90% concrete and 99% steel recycling. | <b>Cycle 1</b> bitumen/slate = $V_1+(1-A) \cdot V_1 \cdot (Q_i/Q_p)+(1-A) \cdot r_2 \cdot (R_1-V_1^* \cdot (Q_o/Q_p))+(1-r_2) \cdot D_1$<br><br><b>Cycle 2</b> bitumen/slate = $(1-r_1) \cdot V_2+r_1 \cdot (A \cdot R_1+(1-A) \cdot V_2 \cdot (Q_i/Q_p))+(1-A) \cdot r_2 \cdot (R_2-R_2^* \cdot (Q_o/Q_p))+(1-r_2) \cdot D_2$ | <b>Cycle 1,2</b> glass = $V_{1,2}+(1-A) \cdot r_2 \cdot (R_{1,3}+R_{1,3}^* \cdot (Q_o/Q_p))+(1-r_2) \cdot D$<br><br>Where $r_2$ is 90% glass recycling at EoL, $R_{1,3}^*$ is 90% glass recycling<br><br><b>Cycle 1,2</b> wood, aluminium, steel, zinc = $V_1+(1-A) \cdot r_2 \cdot ((R_3+R_4)-R_4^* \cdot (Q_o/Q_p))/2$ |

**CFF  
continued**

**Cycle 3** bitumen/slate =  $(1 - r_1) \cdot V_3 + r_1 \cdot (A \cdot R_2 + (1 - A) \cdot V_3 \cdot (Q_i/Q_p)) + (1 - A) \cdot r_2 \cdot (R_3 - R_3^* \cdot (Q_o/Q_p)) + (1 - r_2) \cdot D_3$

$r_1$  is 90% bitumen and slate,  
 $r_2$  is 90% bitumen and slate  
that will be recycled at EoL,  
 $R_{2,3}^*$  is 90% bitumen and  
slate recycling,

**Cycle 1,2,3** polyester =  
 $V_{1,2,3} + r_3 \cdot (D_{1,2,3} -$   
 $L \cdot X_{ER,heat} \cdot E_{SE,heat} -$   
 $L \cdot X_{ER,elect} \cdot E_{SE,elec})$

Where  $r_3$  is 100% polyester  
energy recovery at EoL

**Cycle 1,2** rubber, PVC =  
 $V_1 + r_3 \cdot (D_2 - L \cdot X_{ER,heat} \cdot E_{SE,heat} -$   
 $L \cdot X_{ER,elect} \cdot E_{SE,elec})/2$

Where  $r_3$  is 100% rubber and  
PVC energy recovery at EoL

|           |                                                                                                                                                                                                                                                                                                                                                                                        |                                                                                                                                                                                                                                                                                                                                                                                        |                                                                                                                                                                                                                                                                                                                                                                                                |                                                                                                                                                                                                                                                                                                                                                                           |
|-----------|----------------------------------------------------------------------------------------------------------------------------------------------------------------------------------------------------------------------------------------------------------------------------------------------------------------------------------------------------------------------------------------|----------------------------------------------------------------------------------------------------------------------------------------------------------------------------------------------------------------------------------------------------------------------------------------------------------------------------------------------------------------------------------------|------------------------------------------------------------------------------------------------------------------------------------------------------------------------------------------------------------------------------------------------------------------------------------------------------------------------------------------------------------------------------------------------|---------------------------------------------------------------------------------------------------------------------------------------------------------------------------------------------------------------------------------------------------------------------------------------------------------------------------------------------------------------------------|
| <b>LD</b> | <p><b>Cycle 1</b> =<br/><math>0.56 \cdot V + 0.11 \cdot R_3 + 0.11 \cdot D + 0.5 \cdot R_1</math></p> <p><b>Cycle 2</b> =<br/><math>0.33 \cdot V + 0.33 \cdot R_3 + 0.33 \cdot D + 0.5 \cdot R_1 + 0.5 \cdot R_2</math></p> <p><b>Cycle 3</b> =<br/><math>0.11 \cdot V + 0.56 \cdot R_3 + 0.56 \cdot D + 0.5 \cdot R_2</math></p> <p>Where <math>R_3</math> is counted as disposal</p> | <p><b>Cycle 1</b> =<br/><math>0.56 \cdot V + 0.11 \cdot R_3 + 0.11 \cdot D + 0.5 \cdot R_1</math></p> <p><b>Cycle 2</b> =<br/><math>0.33 \cdot V + 0.33 \cdot R_3 + 0.33 \cdot D + 0.5 \cdot R_1 + 0.5 \cdot R_2</math></p> <p><b>Cycle 3</b> =<br/><math>0.11 \cdot V + 0.56 \cdot R_3 + 0.56 \cdot D + 0.5 \cdot R_2</math></p> <p>Where <math>R_3</math> is counted as disposal</p> | <p><b>Cycle 1</b> =<br/><math>0.56 \cdot V_1 + 0.11 \cdot R_3 + 0.11 \cdot D_3 + 0.5 \cdot R_1</math></p> <p><b>Cycle 2</b> =<br/><math>0.33 \cdot V_2 + 0.33 \cdot R_3 + 0.33 \cdot D_3 + 0.5 \cdot R_1 + 0.5 \cdot R_2</math></p> <p><b>Cycle 3</b> = <math>0.11 \cdot V_3 + 0.56 \cdot R_3 + 0.56 \cdot D_3 + 0.5 \cdot R_2</math></p> <p>Where <math>R_3</math> is counted as disposal</p> | <p><b>Glass:</b><br/><b>Cycle 1</b> = <math>V_1 + 0.5 \cdot R_1 + D_1</math><br/><b>Cycle 2</b> = <math>V_2 + 0.5 \cdot R_3 + D_2</math></p> <p><b>Frame:</b><br/><b>Cycle 1</b> =<br/><math>0.85 \cdot V_1 + 0.5 \cdot R_2 + 0.15 \cdot (D_2 + R_4)</math><br/>)<br/><b>Cycle 2</b> =<br/><math>0.15 \cdot V_1 + 0.5 \cdot R_2 + 0.85 \cdot (D_2 + R_4)</math><br/>)</p> |
|-----------|----------------------------------------------------------------------------------------------------------------------------------------------------------------------------------------------------------------------------------------------------------------------------------------------------------------------------------------------------------------------------------------|----------------------------------------------------------------------------------------------------------------------------------------------------------------------------------------------------------------------------------------------------------------------------------------------------------------------------------------------------------------------------------------|------------------------------------------------------------------------------------------------------------------------------------------------------------------------------------------------------------------------------------------------------------------------------------------------------------------------------------------------------------------------------------------------|---------------------------------------------------------------------------------------------------------------------------------------------------------------------------------------------------------------------------------------------------------------------------------------------------------------------------------------------------------------------------|

### S3. Deriving the CE LD approach

A graphical representation of how the CE LD equation for dividing the production impacts was derived is shown in the figure below. The red line represents (in this case) the virgin material production impacts' distribution between the use cycles, where the distribution decreases linearly from use cycle 1 to 'n'. The distribution is calculated in percentage emission.

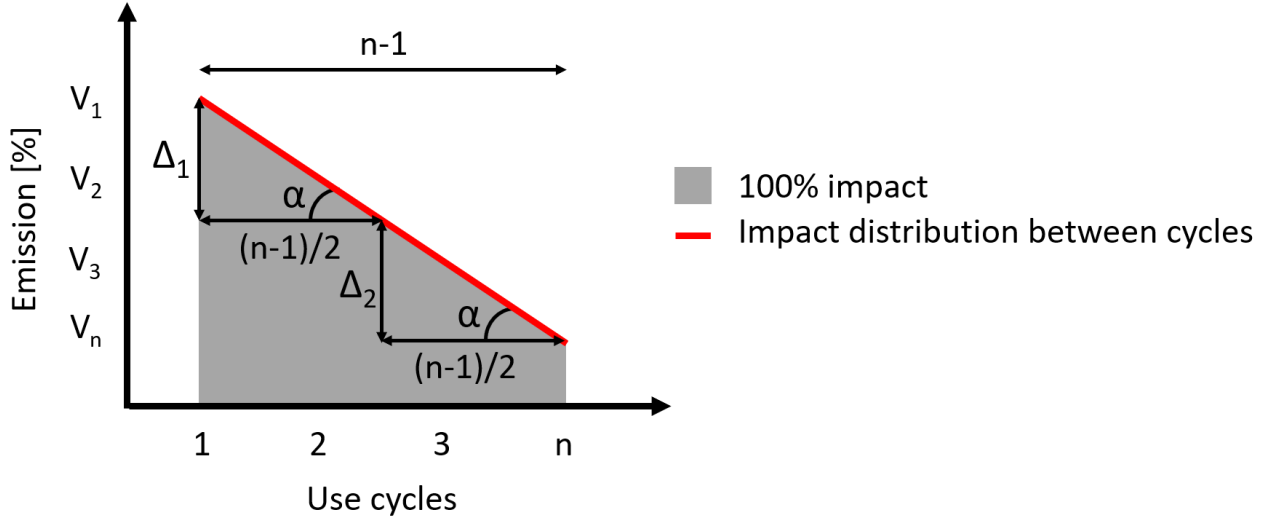

**Figure 2.** Explanatory illustration of the developed LD equation

The total impact over the use cycles will always be 100% (i.e. the grey area of the graph), thus the average impact in percentage is:

$$Av = \frac{100\%}{n} \quad (1)$$

Where n is the total number of use cycles. The coefficient,  $\alpha$ , i.e. the slope of the graph in Figure 2 is:

$$\alpha = \frac{V_1 - V_n}{n - 1} \quad (2)$$

Where  $V_1$  is the emission from virgin material production allocated to the first use cycle,  $V_n$  is the emission from virgin material production allocated to the last use cycle and (n-1) is the number of spaces between the use cycles. The environmental impact allocated to the first use cycle is then:

$$V_1 = Av + \Delta_1 \text{ where } \Delta_1 = \alpha * \frac{(n-1)}{2} \quad (3)$$

$$V_1 = \frac{100\%}{n} + \frac{V_1 - V_n}{n - 1} * \frac{(n - 1)}{2}$$

The average impact is added to the slope of the line to find out how much impact should be added to the average impact towards the first use cycle. The slope is multiplied by (n-1)/2 which represents the distance from the first use cycle to the middle of the line. (n-1)/2 is used as a calculation

technicality to account for situations when there is an odd number of cycles. Similarly, the n'th cycle is:

$$V_n = Av - \Delta, \text{ where } \Delta_2 = \alpha * \frac{(n-1)}{2} \quad (4)$$

$$V_n = \frac{100\%}{n} - \frac{V_1 - V_n}{n-1} \cdot \frac{(n-1)}{2}$$

However, here the average impact is subtracted from the slope of the line to find out how much impact should be deducted from the average impact towards the last use cycle.

It is decided that the first use cycle should be impacted 'F'-times as much as the last use cycle:

$$V_1 = F \cdot V_n \quad (5)$$

$V_1$  from (5) is inserted into (3) which gives:

$$F \cdot V_n = \frac{100\%}{n} + \frac{V_1 - V_n}{n-1} \cdot \frac{(n-1)}{2} \quad (6)$$

By adding (4) with (6) the equations can be reduced to:

$$V_n = \frac{100\%}{n} - \frac{V_1 - V_n}{n-1} \cdot \frac{(n-1)}{2} \quad (7)$$

+

$$F \cdot V_n = \frac{100\%}{n} + \frac{V_1 - V_n}{n-1} \cdot \frac{(n-1)}{2}$$

---


$$(F+1) \cdot V_n = 2 \cdot \frac{100\%}{n}$$

The percentage of the total environmental impact from all use cycles allocated to the n'th user is:

$$V_n = 2 \cdot \frac{\frac{100\%}{n}}{(F+1)} = \frac{2 \cdot 100\%}{n \cdot (F+1)} \quad (8)$$

Inserting  $V_n$  from (8) into (5) then gives  $V_1$ :

$$V_1 = F \cdot 2 \cdot \frac{\frac{100\%}{n}}{(F+1)} = \frac{F \cdot 2 \cdot 100\%}{n \cdot (F+1)} \quad (9)$$

**Concrete column calculation example:** distribution of virgin concrete production impact between the cycles

Number of cycles:

$$n = 4$$

Allocation factor:

$$F = 50$$

The average impact is:

$$Av = \frac{100\%}{n} = \frac{100\%}{4} = 25\% \quad (1)$$

$V_1$  is:

$$V_1 = \frac{F \cdot 2 \cdot 100\%}{n \cdot (F + 1)} = \frac{50 \cdot 2 \cdot 100\%}{4 \cdot (50 + 1)} = \mathbf{49\%} \quad (9)$$

$V_4$  is:

$$V_4 = \frac{2 \cdot 100\%}{n \cdot (F + 1)} = \frac{2 \cdot 100\%}{4 \cdot (50 + 1)} = \mathbf{1\%} \quad (8)$$

The coefficient,  $\alpha$ , (i.e. the difference between one use cycle and the next) is:

$$\alpha = \frac{V_1 - V_n}{n - 1} = \frac{49\% - 1\%}{4 - 1} = 16\% \quad (2)$$

The impact percentage of intermediate cycle  $V_2$  is then:

$$V_2 = V_1 - \alpha = 49\% - 16\% = \mathbf{33\%}$$

And The impact percentage of intermediate cycle  $V_3$  is:

$$V_3 = V_2 - \alpha = 33\% - 16\% = \mathbf{17\%}$$

The impacts of each cycle are summed to check if the total impact adds up to 100%:

$$V_1 + V_2 + V_3 + V_4 = 49\% + 33\% + 17\% + 1\% = 100\%$$

On the concrete column flow chart from Appendix C, the distribution is thus:

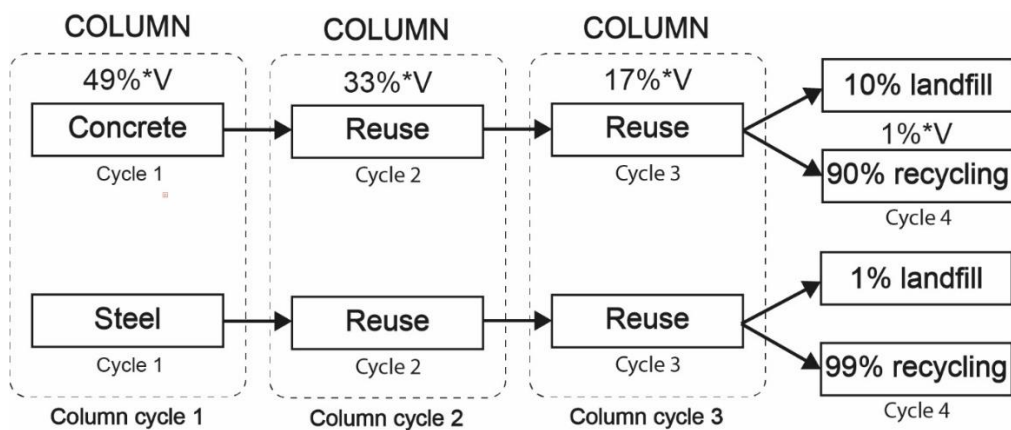



## S4. Expert session evaluation of the developed CE LD approach

**Note:** The percentage of expert sessions in which each issue under each category was raised is shown using a grey-scale where dark grey indicates the most counts and white the least counts.

|               | Category                   | Remarks                                                                                                      | Percentage of expert sessions in which the issue was raised |
|---------------|----------------------------|--------------------------------------------------------------------------------------------------------------|-------------------------------------------------------------|
| Advantages    | Applicability              | Suitable for ex-ante assessment (e.g., in policymaking, early stage design)                                  | 30%                                                         |
|               |                            | Suitable to assess multiple (future) cycles                                                                  | 60%                                                         |
|               |                            | Most suitable for (reproducible) building component or product level                                         | 60%                                                         |
|               |                            | Supports determining more ideal CE (e.g., ideal vision for back-casting)                                     | 30%                                                         |
|               |                            | Also suitable when materials cannot be re-used or recycled at same value                                     | 10%                                                         |
|               | Incentives CE              | Method incentivises not only narrowing, but also slowing and (high-value) closing cycles                     | 30%                                                         |
|               | Levels                     | CE-LCA introduces 'missing' building component level in LCA                                                  | 10%                                                         |
|               | Fair accounting impacts    | The linear degressive method divides burden fairly between cycles; no double crediting possible              | 20%                                                         |
|               |                            | All cycles are included; impacts from other cycles (e.g., production, disposal) remain visible in all cycles | 20%                                                         |
|               | Ease of use                | The allocation formula understandable and transparent (better than the PEF)                                  | 30%                                                         |
|               | Instrument for discussion  | Method stimulates (re)discussing problems and incentives in current LCA standards                            | 20%                                                         |
|               |                            | Method show how we could include CE in LCA                                                                   | 30%                                                         |
|               |                            | Method shows how complex CE in design and the Built environment is                                           | 10%                                                         |
| Disadvantages | Non-applicability          | Less suitable for ex-post assessments.                                                                       | 20%                                                         |
|               |                            | Less suitable for building scale (too complex, uncertain, no control by producing supply chain)              | 40%                                                         |
|               | Uncertainty in assumptions | Difficult to determine and guarantee future cycles; leads to not-accurate results                            | 60%                                                         |
|               |                            | Uncertainty in assumptions far in the future (cycles, processes, energy mix are unknown)                     | 50%                                                         |
|               |                            | Sensitive to assumptions on functional, technical and economic lifespan                                      | 30%                                                         |
|               | Greenwashing impacts       | Burdens can be shifted towards [non-existent cycles] the future, diluting impacts                            | 60%                                                         |

|              |                                                                  |                                                                                                                                           |     |
|--------------|------------------------------------------------------------------|-------------------------------------------------------------------------------------------------------------------------------------------|-----|
| Improvements | <b>Challenging to implement</b>                                  | Easy to mis-use by industry by adding future cycles.                                                                                      | 60% |
|              |                                                                  | Requires transition in building industry to determine all cycles (i.e., from one-off projects to a (closed loop) component-wise industry) | 50% |
|              |                                                                  | Difficult to implement a new LCA methods in practice, it is easier to adapt the current LCA standard                                      | 30% |
|              |                                                                  | All cycles need to be documented and kept traceable over long-term (e.g., government regulation is needed)                                | 30% |
|              |                                                                  | Current LCA tools in practice cannot do a CE-LCA calculation                                                                              | 10% |
|              | <b>Difficulties in use</b>                                       | Method is complex                                                                                                                         | 50% |
|              |                                                                  | Method is time consuming                                                                                                                  | 30% |
|              | <b>Urgency</b>                                                   | Virgin production burdens should be in first cycles to reduce our impacts now                                                             | 40% |
|              | <b>Improvements ease of use</b>                                  | Make the method understandable and simple to use, (e.g., include a manual, concrete examples, clarify terms, single indicator system)     | 50% |
|              |                                                                  | Make method affordable and fast to use                                                                                                    | 20% |
|              |                                                                  | Provide (more) background data; make data accessible to industry                                                                          | 40% |
|              |                                                                  | Shift burden of proof for CE-LCA proof from building level to component level (i.e., component-EPD's)                                     | 10% |
|              |                                                                  | Translate to a design synthesis tool (e.g., guidelines, flowchart) and practice assessment tool                                           | 50% |
|              | <b>Improvement accuracy and certainty in allocation approach</b> | Differentiate between different objects of assessment in CE-LCA                                                                           | 10% |
|              |                                                                  | Differentiate different cycles (i.e., known or unknown, high-value or low-value, open or closed)                                          | 40% |
|              |                                                                  | Prefer system expansion with up-front crediting over allocation for known cycles, mass production, direct re-use and recycling            | 20% |
|              |                                                                  | Include market situation and material quality factors in allocation approach                                                              | 20% |
|              |                                                                  | Add probability factor for cycles to CE-LCA                                                                                               | 10% |
|              |                                                                  | Include (use) time in allocation approach                                                                                                 | 20% |
|              |                                                                  | Differentiate LCA levels (do not interlink them)                                                                                          | 30% |
|              | <b>Improvement ease of implementation in practice</b>            | Develop rules, template or regulation for cycles (i.e., amount, division of impact, types of cycles, system boundary)                     | 60% |
|              |                                                                  | Prefer an LCA 'tax' system: producer takes initial production and EOL impacts; cycles can be added over time                              | 10% |
|              |                                                                  | Test the method in a real-life case with stakeholders                                                                                     | 40% |
|              |                                                                  | Use CE-LCA as an additional informational module "circular potential" next to standard LCA                                                | 20% |
|              | <b>Improvement of certainty and prevention of misuse</b>         | Obligatory peer review of CE-LCA                                                                                                          | 10% |
|              |                                                                  | Include a sensitivity analysis on influence of varying future cycles                                                                      | 10% |

---

|                                      |                                                                                                                     |
|--------------------------------------|---------------------------------------------------------------------------------------------------------------------|
| <b>Widen scope<br/>CE assessment</b> | Assessment on other criteria should be part of CE assessment<br>(i.e., value, costs, material flow, social factors) |
|--------------------------------------|---------------------------------------------------------------------------------------------------------------------|

---

|     |
|-----|
| 30% |
|-----|
